# Supplementary material
Source: Research Square preprint supplement (doi:10.21203/rs.3.rs-9205693/v1)
Supplement: Supplementary file 1 [file 9e481368319424861f7376d5.docx]

**Supplementary Table 1. Sensitivity analysis.**

|  | Univariate | | Multivariate | |
| --- | --- | --- | --- | --- |
| OR (95%CI) | p-value | OR (95%CI) | p-value |
| Age | 0.97 (0.89-1.05) | 0.45 | 0.92 (0.79-1.08) | 0.34 |
| Disease duration | 0.95 (0.92-0.97) | <0.001*** | 0.96 (0.91-0.99) | 0.048* |
| Sex (male) | 1.12 (0.58-2.15) | 0.74 | 0.72 (0.24-2.17) | 0.56 |
| Ever smoker | 1.40 (0.79-2.48) | 0.25 | 0.88 (0.33-2.35) | 0.80 |
| Seropositivity | 0.61 (0.33-1.15) | 0.13 | 0.49 (0.18-1.34) | 0.16 |
| HAQ score | 0.08 (0.03-0.23) | <0.001*** | 0.12 (0.04-0.36) | <0.001*** |
| GC use | 0.26 (0.14-0.9) | <0.001*** | 0.46 (0.31-0.67) | 0.024* |
| MTX use (Combi therapy) | 1.51 (1.04-2.18) | 0.028* | 2.23 (1.22-4.08) | 0.0089** |

Conditional multiple logistic regression was performed on post-propensity score-matched data both in univariable and multivariable analysis. * p<0.05, ** p<0.01, *** p<0.001.

**Supplementary Table 2. Multiple regression analysis for DAS28(ESR) in the patients with Combi therapy.**

|  | regression coefficient (b) | 95% CI | t value | p-value |
| --- | --- | --- | --- | --- |
| Age | 0.012 | -0.011, 0.035 | 1.016 | 0.31 |
| Sex (female) | -0.82 | -1.57, -0.061 | -2.15 | 0.035* |
| Disease duration | 0.0068 | -0.017, 0.030 | 0.57 | 0.57 |
| Seropositivity | 0.20 | -0.47, 0.87 | 0.60 | 0.55 |
| GC dose | 0.095 | -0.031, 0.22 | 1.50 | 0.14 |
| MTX dose | 0.020 | -0.078, 0.12 | 0.40 | 0.69 |

Multiple regression analysis for DAS28(ESR) as a dependent variable was performed. Age, sex disease duration, seropositivity, GC dose and MTX dose were independent variables. * p<0.05.

**Supplementary Table 3. Comparison between the patients with and without hospitalization due to serious adverse events (SAEs).**

| hospitalization due to serious adverse events (SAEs) | No  (n = 1171) | Yes  (n = 114) | p-value |
| --- | --- | --- | --- |
| Age (years) | 68.3 ± 12.6 | 74.4 ± 9.7 | <0.001*** |
| Disease duration (years) | 15.5 ± 11.3 | 18.4 ± 12.6 | 0.005** |
| Sex (female) | 956 (81.6 %) | 110 (76.4 %) | 0.14 |
| BMI | 23.1 ± 4.0 | 23.3 ± 4.1 | 0.69 |
| Ever smoker | 358 (34.6 %) | 43 (35.5 %) | 0.84 |
| Class 1  2  3  4 | 313 (29.2 %)  555 (51.8 %)  185 (17.3 %)  19 (1.8 %) | 21 (15.4 %)  65(47.8%) 40(29.4 %)  10 (7.4 %) | <0.001*** |
| Stage 1  2  3  4 | 277 (25.6 %)  293 (27.1 %)  197 (18.2 %)  313 (29.0 %) | 26 (19.0 %)  32 (23.4 %)  27 (19.7 %)  52 (38.0 %) | 0.12 |
| PtGA | 2.40 ± 2.27 | 3.12 ± 2.47 | 0.001** |
| EGA | 1.22 ± 1.34 | 1.46 ± 1.38 | 0.053 |
| SJC28 | 1.16 ± 2.83 | 1.26 ± 2.47 | 0.708 |
| TJC28 | 0.84 ± 2.05 | 1.35 ± 2.99 | 0.009** |
| CRP (mg/dL) | 0.38 ± 0.82 | 1.07 ± 3.05 | <0.001*** |
| ESR (mm/h) | 28.2 ± 22.8 | 41.5 ± 27.8 | <0.001*** |
| DAS28(ESR) | 2.92 ± 1.12 | 3.37 ± 1.09 | <0.001*** |
| DAS28(CRP) | 2.13 ± 0.97 | 2.49 ± 0.99 | <0.001*** |
| SDAI | 6.12 ± 6.61 | 8.01 ± 6.60 | 0.003** |
| CDAI | 5.73 ± 6.31 | 7.21 ± 6.08 | 0.012* |
| Pain VAS | 2.27 ± 2.22 | 2.85 ± 2.43 | 0.005** |
| seropositivity | 727 (80.8 %) | 89 (80.9 %) | 1.0 |
| RF titer (IU/mL) | 169.9 ± 384.4 | 154.7± 264.7 | 0.69 |
| Anti-CCP2 Ab titer (IU/mL) | 239.3 ± 441.3 | 360.7± 855.0 | 0.074 |
| HAQ score | 0.44 ± 0.62 | 0.71 ± 0.73 | <0.001*** |
| Treatment |  |  |  |
| GC user  mean dose in users  (mg/day in PSL) | 305 (26.0 %)  3.28 ± 2.20 | 64 (44.4 %)  4.36 ± 2.90 | <0.001***  0.001** |
| MTX user  mean dose in users  (mg/week) | 505 (43.1 %)  7.53 ± 3.02 | 39 (27.1 %)  7.32 ± 2.82 | <0.001***  0.67 |
| NSAID user | 400 (34.2 %) | 66 (45.3 %) | 0.007** |

The comparison was performed by Fisher’s extract test and two-tailed unpaired t-tests were applied for statistical analysis. * p<0.05, ** p<0.01, *** p<0.001.
