# Supplementary material
Source: Research Square preprint supplement (doi:10.21203/rs.3.rs-9205693/v1)
Supplement: Supplementary file 2 [file fc2248d3979b1ef8c435390b.docx]

**Investigators in NinJa**

The authors would like to acknowledge all investigators in the National Database of Rheumatic Diseases in Japan (NinJa) in 2022. Investigators in NinJa: Toshio Odani (National Hospital Organization (NHO) Hokkaido Medical Center), Yukitomo Urata (Tsugaru General Hospital), Fuminori Hirano (NHO Asahikawa Medical Center), Shintaro Yano (Maebashi Hirosegawa Clinic), Yuya Kondo (University of Tsukuba Hospital), Toshihide Mimura (Saitama Medical University Hospital), Yuho Kadono (Saitama Medical University Hospital), Yuji Akiyama (Japanese Red Cross Ogawa Hospital), Takao Sugiyama (NHO Shimoshizu National Hospital), Noboru Hagino (Teikyo University Chiba Medical Center), Toshikazu Kano (Kohnodai Hospital, National Center for Global Health and Medicine), Sakae Tanaka (The University of Tokyo Hospital), Keishi Fujio (The University of Tokyo Hospital), Katsuya Suzuki (NHO Tokyo Medical Center), Naoto Yokogawa (Tokyo Metropolitan Tama Medical Center), Yoji Komiya (Tokyo Medical and Dental University Hospital), Akiko Aoki (Tokyo Medical University Hachioji Medical Center), Takuji Nishikawa (Tokyo Metropolitan Bokutoh Hospital), Hisanori Nakayama (Soshigaya Okura Clinic), Yasuhiko Kita (Yokohama Rosai Hospital), Atsushi Ihata (NHO Yokohama Medical Center), Kimito Kawahata (St. Marianna University Hospital), Tetsuro Yasui (Teikyo University Hospital, Mizonokuchi), Kensuke Koyama (University of Yamanashi Hospital), Satoshi Ito (Niigata Rheumatic Center), Hideshi Yamazaki (Marunouchi Hospital), Hiroshi Tsutani (NHO Awara Hospital), Isao Matsushita (Sainou Clinic), Toshihisa Kojima (NHO Nagoya Medical Center), Masao Katayama (NHO Nagoya Medical Center), Satoru Ohashi (Ohashi-Tani Orthopaedics), Shiro Ohshima (NHO Osaka Minami Medical Center), Koichiro Takahi (NHO Osaka Toneyama Medical Center), Kiyoshi Matsui (Hyogo Medical University Hospital), Satoshi Kashiwagi (Amagasaki Health Co-operative Hospital), Misuzu Fujimori (NHO Himeji Medical Center), Yasuhiko Yoshinaga (Kurashiki Medical Center), Shintaro Hirata (Hiroshima University Hospital), Akinori Matsumori (NHO Kochi National Hospital), Tomoya Miyamura (NHO Kyushu Medical Center), Shigeru Yoshizawa (NHO Fukuoka National Hospital), Kouichiro Aratake (NHO Ureshino Medical Center), Yasuo Suenaga (NHO Beppu Medical Center), Norie Yoshikawa (NHO Miyakonojo Medical Center), Hirokazu Takaoka (Kumamoto Shinto General Hospital), Kenichiro Tokunaga (Japanese Red Cross Kumamoto Hospital), Hideo Otsubo (Japanese Red Cross Kagoshima Hospital), Issaku Toyohara (Northern Okinawa Medical Center).
